# Supplementary material for: Organs, Cultivars, Soil, and Fruit Properties Affect Structure of Endophytic Mycobiota of Pinggu Peach Trees
Source: MDPI journal article supplement (doi:10.3390/microorganisms7090322), 2019-09-05
Supplement: s1 [file s1]

Supplementary Table 1 The soil properties of three orchards

| Soils properties | Orchard1      | Orchard 2     | Orchard 3     |
|------------------|---------------|---------------|---------------|
|                  | (T1)          | (T2)          | (T3)          |
| pH               | 6.5(±0.1 )    | 6.2(±0.1 )    | 6.8(±0.2 )    |
| Soil C(g/kg)     | 41.4(±0.3 )   | 48.5(±0.2 )   | 49.3(±0.4 )   |
| Soil N(g/kg)     | 3.45(±0.05 )  | 4.39(±0.02 )  | 4.25(±0.02 )  |
| P (g/kg)         | 0.526(±0.004) | 0.484(±0.002) | 0.583(±0.002) |
| K (g/kg)         | 25.4(±0.2 )   | 22.7(±0.20 )  | 26.4(±0.2 )   |
| Na (g/kg)        | 14.0(±0.1 )   | 14.5(±0.2 )   | 13.8(±0.2 )   |

Supplementary Table 2 The fruit properties of three cultivars

| Fruit properties          | T1           | T2           | T3           |
|---------------------------|--------------|--------------|--------------|
| Single fruit Weight (g)   | 255(±2.5 )   | 190(±2.2 )   | 285(±3.3 )   |
| Soluble solid Content (%) | 15.5(±0.2 )  | 13.5(±0.2 )  | 14.9(±0.3 )  |
| Titratable acidity (%)    | 0.19(±0.03 ) | 0.29(±0.05 ) | 0.16(±0.02 ) |
